# Supplementary material
Source: PubMed Central journal article supplement (PMC3564553)

## SUPPLEMENTAL INFORMATION

### Supplementary Figure Legends

**Supplementary Figure 1 (related to Figure 1).** Gallery of reconstructed thalamocortical axons for control (upper two rows) and deprived groups (lower two rows).

**Supplementary Figure 2 (related to Figure 5).** Additional analyses of L4 response magnitudes and correlations.

(A) Normalized population peri-stimulus time histograms (PSTHs) of layer 4 cortical neurons recorded in control (cyan) and deprived rats (red). Population PSTHs were normalized to their peaks and overlaid. Bottom: stimulus representation.

(B) Left: Raster plots for a pair of layer 4 cortical neurons recorded in a control animal, with the corresponding correlogram plotted below. Right: Segments indicated by the boxes in the rasters at left were magnified and overlaid, with the spikes from one cell represented as triangles and spikes from the other cell represented as circles.

(C) Same as B for a pair recorded in a deprived animal.

(D) Population cross-correlograms for control and deprived groups were normalized to their peaks and overlaid.



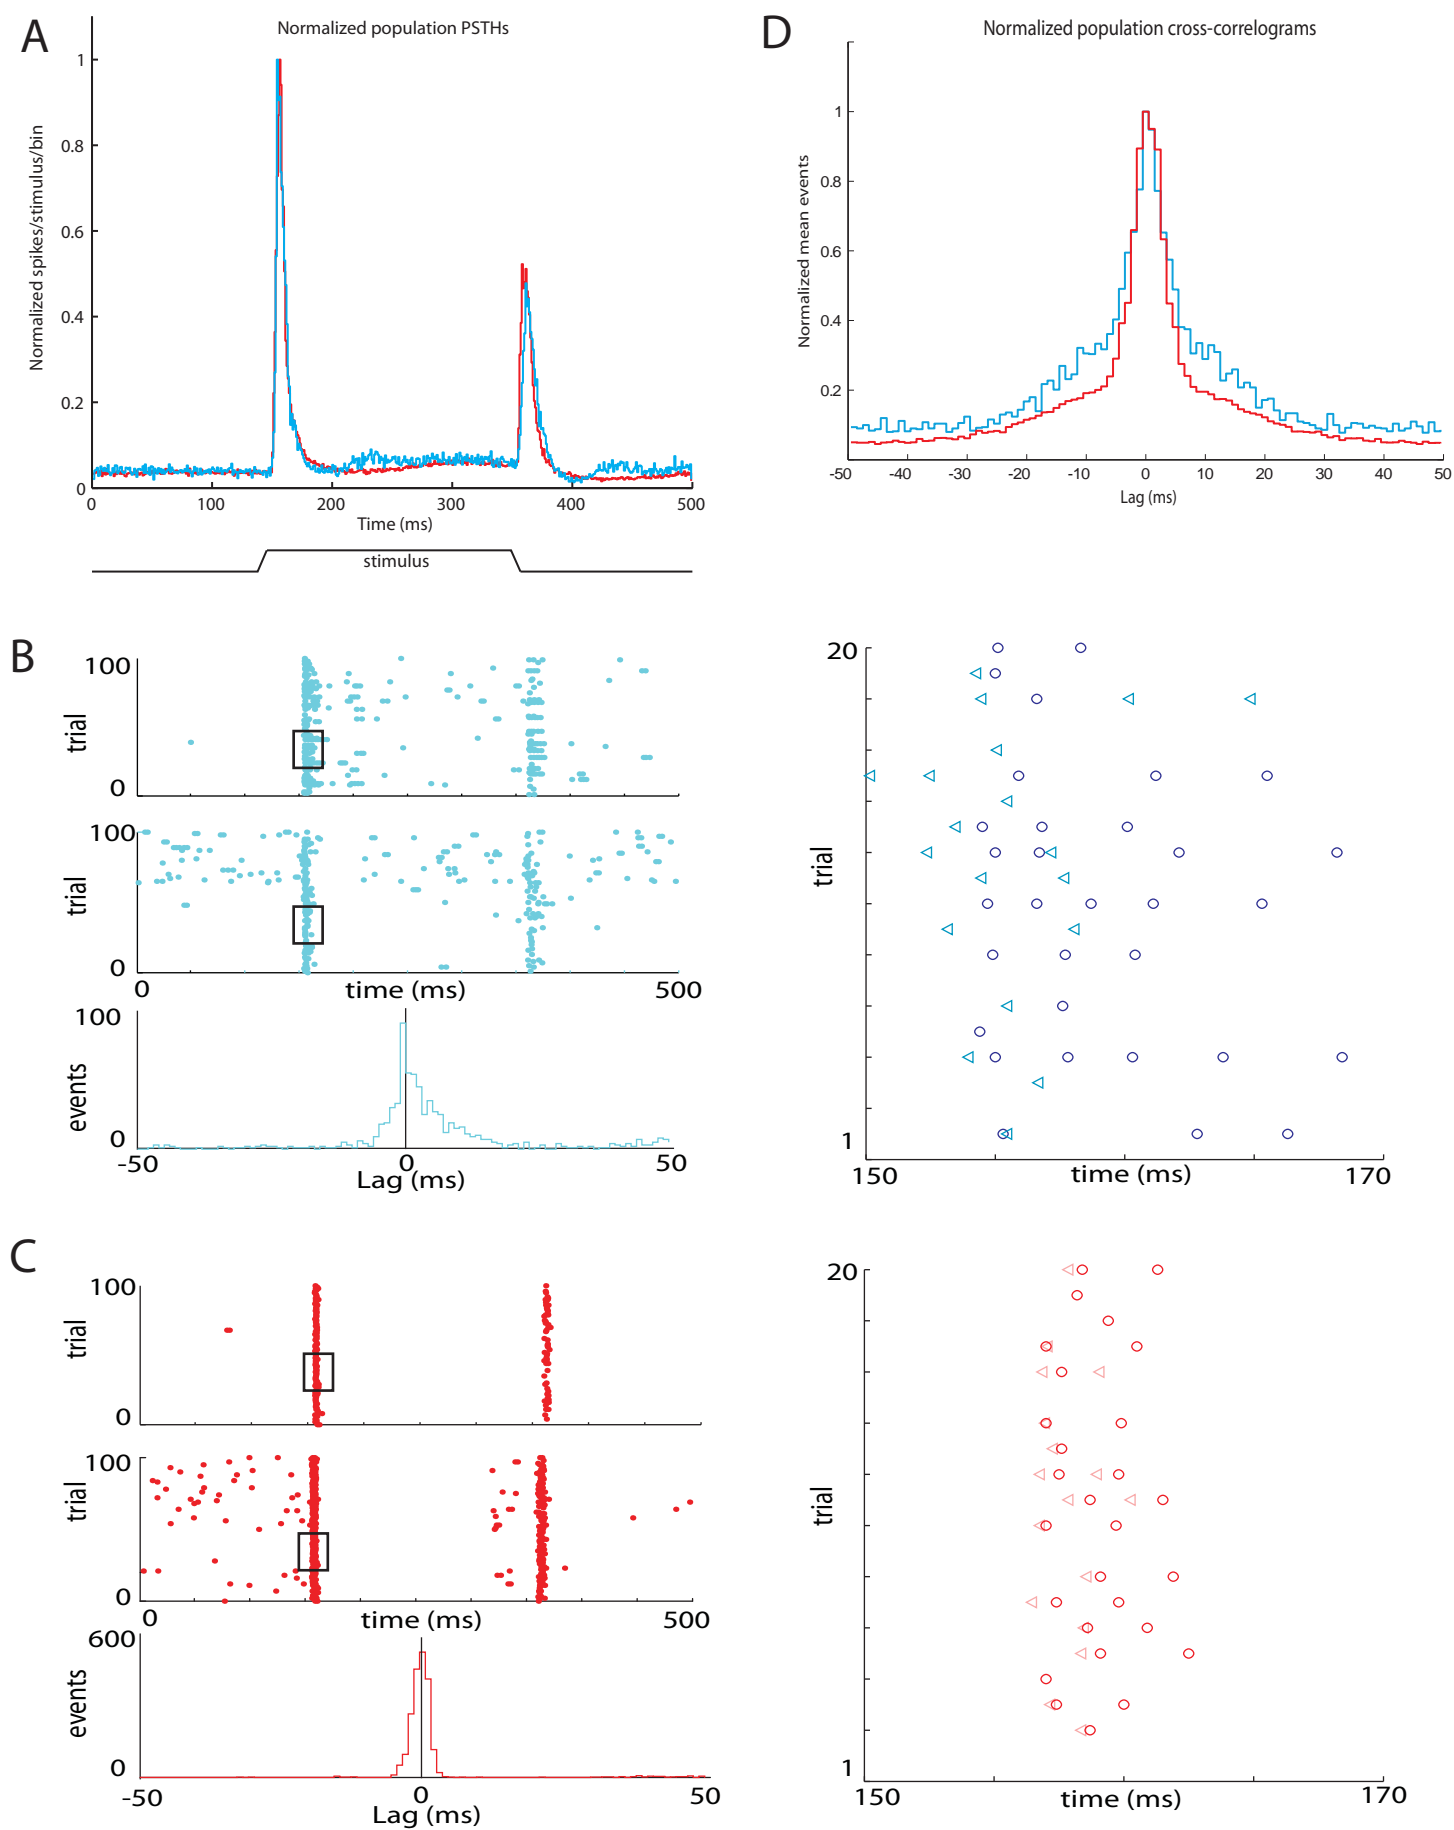

Supplement: NIHMS368297-supplement-01.pdf [file NIHMS368297-supplement-01.pdf]
